# Supplementary material for: Reaction between CH 3 C(O)OOH (peracetic acid) and OH in the gas-phase: A combined experimental and theoretical study of the kinetics and mechanism
Source: Copernicus journal article supplement (doi:10.5194/acp-2020-658), 2020-07-14
Supplement: Supplementary file 1 [file acp-2020-658-supplement.pdf]

# **Reaction between CH<sub>3</sub>C(O)OOH (peracetic acid) and OH: A combined experimental and theoretical study of the kinetics and mechanism**

Matias Berasategui<sup>1</sup>, Damien Amedro<sup>1</sup>, Luc Vereecken<sup>2</sup>, Jos Lelieveld and John N. Crowley<sup>1</sup>

<sup>1</sup>Division of Atmospheric Chemistry, Max-Planck-Institut für Chemie, 55128 Mainz, Germany

<sup>2</sup>Institute for Energy and Climate Research: IEK-8, Forschungszentrum Juelich, 52425 Juelich, Germany

*Correspondence to:* John N. Crowley (john.crowley@mpic.de)

## **Supplementary Information**

**Table S1.** Rate constants for the reaction OH ( $k_6$ ) and OD ( $k_7$ ) with CH<sub>3</sub>C(O)OH at 298 K.

| Precursor                          | [CH <sub>3</sub> C(O)OH] <sup>a</sup> | [Precursor] <sup>b</sup> | [OH] <sub>0</sub> <sup>c</sup> | $k^d$          | $k_6$ or $k_7^e$ |
|------------------------------------|---------------------------------------|--------------------------|--------------------------------|----------------|------------------|
| H <sub>2</sub> O <sub>2</sub> (OH) | 0                                     | 19.42                    | 6.47                           | 472.67 ± 2.3   | 6.95 ± 0.08      |
|                                    | 19.54 ± 1.20                          | 19.42                    | 6.48                           | 1679.33 ± 6.2  |                  |
|                                    | 24.70 ± 1.25                          | 19.42                    | 6.48                           | 2016.66 ± 12.3 |                  |
|                                    | 30.76 ± 1.31                          | 19.41                    | 6.47                           | 2606.32 ± 9.2  |                  |
|                                    | 36.82 ± 1.37                          | 19.42                    | 6.48                           | 3046.21 ± 8.7  |                  |
|                                    | 41.76 ± 1.04                          | 19.42                    | 6.47                           | 3363.66 ± 10.6 |                  |
| H <sub>2</sub> O <sub>2</sub> (OH) | 0                                     | 4.85                     | 1.62                           | 668.94 ± 10.4  | 7.04 ± 0.28      |
|                                    | 17.75 ± 1.18                          | 3.83                     | 1.28                           | 1930.14 ± 59.3 |                  |
|                                    | 4.01 ± 1.04                           | 3.33                     | 1.11                           | 986.54 ± 17.2  |                  |
|                                    | 11.64 ± 1.17                          | 2.99                     | 1.00                           | 1512.84 ± 30.4 |                  |
|                                    | 18.51 ± 1.19                          | 3.23                     | 1.08                           | 1972.35 ± 43.9 |                  |
|                                    | 21.95 ± 1.22                          | 2.99                     | 1.00                           | 2229.59 ± 35.0 |                  |
|                                    | 24.81 ± 1.25                          | 2.56                     | 0.85                           | 2393.95 ± 39.4 |                  |
| DNO <sub>3</sub> (OD)              | 0                                     | 5.84                     | 1.95                           | 1129.54 ± 26.5 | 7.30 ± 0.26      |
|                                    | 14.15 ± 1.14                          | 5.95                     | 1.98                           | 2153.9 ± 58.2  |                  |
|                                    | 9.88 ± 1.10                           | 6.31                     | 2.11                           | 1865.88 ± 60.2 |                  |
|                                    | 11.45 ± 1.11                          | 5.95                     | 1.99                           | 1960.29 ± 48.0 |                  |
|                                    | 16.17 ± 1.16                          | 6.32                     | 2.11                           | 2312.91 ± 47.5 |                  |
|                                    | 4.27 ± 1.04                           | 5.88                     | 1.96                           | 1436.82 ± 43.0 |                  |

<sup>a</sup> in 10<sup>14</sup> molecule cm<sup>-3</sup> (errors are total uncertainty, 2σ).

<sup>b</sup> in 10<sup>14</sup> molecule cm<sup>-3</sup>.

<sup>c</sup> Calculated from [H<sub>2</sub>O<sub>2</sub>] or [DNO<sub>3</sub>], in 10<sup>11</sup> molecule cm<sup>-3</sup>.

<sup>d</sup> First-order decay constant for OH or OD (s<sup>-1</sup>).

<sup>e</sup> 10<sup>-13</sup> cm<sup>3</sup> molecule<sup>-1</sup> s<sup>-1</sup>.

**Table S2.** Reaction between OH or OD and CH<sub>3</sub>C(O)OOH : Experimental conditions and Results.

| Temp (K) | Precursor         | [CH <sub>3</sub> C(O)OH] <sup>a</sup> | [CH <sub>3</sub> C(O)OOH] <sup>b</sup> | [OH] <sub>0</sub> <sup>c</sup> | $k_4' + k_6' + k_d$ | $k_6'$     | $k_4' + k_d$ | $k_4$     |
|----------|-------------------|---------------------------------------|----------------------------------------|--------------------------------|---------------------|------------|--------------|-----------|
| 298      | PAA               | 12.8 ± 0.41                           | 26.8 ± 2.87                            | 13.4                           | 1089 ± 5            | 904 ± 141  | 185±128      | 3.2 ± 0.6 |
|          |                   | 8.20 ± 0.47                           | 16.7 ± 2.36                            | 8.3                            | 715 ± 3             | 579 ± 90   | 136±82       |           |
|          |                   | 15.6 ± 0.39                           | 35.7 ± 3.32                            | 17.9                           | 1337 ± 3            | 1102 ± 172 | 235±156      |           |
|          |                   | 14.5 ± 0.40                           | 33.5 ± 3.21                            | 16.8                           | 1254 ± 4            | 1024 ± 160 | 230±145      |           |
|          |                   | 2.52 ± 0.58                           | 6.17 ± 1.84                            | 3.1                            | 302 ± 2             | 178 ± 28   | 124±25       |           |
|          |                   | 4.82 ± 0.53                           | 11.6 ± 2.11                            | 5.8                            | 470 ± 3             | 340 ± 53   | 130±48       |           |
| 306      | PAA               | 8.62 ± 0.48                           | 12.9 ± 2.17                            | 6.4                            | 744 ± 6             | 570 ± 89   | 174±81       | 4.3 ± 0.5 |
|          |                   | 20.2 ± 0.36                           | 37.8 ± 3.42                            | 18.9                           | 1611 ± 12           | 1335 ± 209 | 276±189      |           |
|          |                   | 13.0 ± 0.42                           | 21.9 ± 2.63                            | 10.9                           | 1081 ± 8            | 859 ± 134  | 222±122      |           |
|          |                   | 18.3 ± 0.37                           | 32.5 ± 3.15                            | 16.2                           | 1459 ± 12           | 1210 ± 189 | 249±172      |           |
|          |                   | 15.8 ± 0.40                           | 28.0 ± 2.93                            | 14.0                           | 1299 ± 11           | 1044 ± 163 | 255±148      |           |
| 316      | PAA               | 8.49 ± 0.48                           | 13.7 ± 2.22                            | 6.9                            | 665 ± 5             | 520 ± 81   | 145±74       | 3.7 ± 0.6 |
|          |                   | 20.2 ± 0.36                           | 38.5 ± 3.45                            | 19.2                           | 1498 ± 9            | 1238 ± 193 | 260±175      |           |
|          |                   | 12.8 ± 0.42                           | 22.7 ± 2.66                            | 11.3                           | 1005 ± 6            | 784 ± 123  | 220±111      |           |
|          |                   | 18.1 ± 0.38                           | 32.6 ± 3.16                            | 16.3                           | 1322 ± 8            | 1109 ± 173 | 213±157      |           |
|          |                   | 15.4 ± 0.40                           | 28.8 ± 2.97                            | 14.4                           | 1160 ± 8            | 944 ± 147  | 217±134      |           |
|          |                   | 3.90 ± 0.56                           | 6.79 ± 1.87                            | 3.4                            | 377 ± 2             | 239 ± 37   | 138±34       |           |
| 326      | PAA               | 8.35 ± 0.49                           | 14.4 ± 2.25                            | 7.2                            | 616 ± 6             | 478 ± 75   | 138±68       | 2.5 ± 0.8 |
|          |                   | 19.9 ± 0.38                           | 37.8 ± 3.42                            | 18.9                           | 1400 ± 8            | 1140 ± 178 | 260±161      |           |
|          |                   | 12.4 ± 0.45                           | 22.9 ± 2.68                            | 11.5                           | 882 ± 8             | 710 ± 111  | 172±101      |           |
|          |                   | 17.7 ± 0.40                           | 33.2 ± 3.19                            | 16.6                           | 1226 ± 11           | 1014 ± 158 | 212±144      |           |
|          |                   | 15.2 ± 0.41                           | 29.1 ± 2.98                            | 14.5                           | 1061 ± 10           | 871 ± 136  | 190±124      |           |
|          |                   | 4.70 ± 0.56                           | 8.21 ± 1.94                            | 4.1                            | 421 ± 3             | 269 ± 42   | 152±38       |           |
| 335      | PAA               | 8.92 ± 0.49                           | 14.9 ± 2.28                            | 7.5                            | 643 ± 7             | 481 ± 75   | 162±68       | 2.9 ± 0.6 |
|          |                   | 19.4 ± 0.39                           | 37.3 ± 3.40                            | 18.7                           | 1321 ± 9            | 1046 ± 163 | 275±148      |           |
|          |                   | 12.4 ± 0.44                           | 20.7 ± 2.56                            | 10.3                           | 852 ± 11            | 669 ± 104  | 184±95       |           |
|          |                   | 17.9 ± 0.39                           | 32.3 ± 3.15                            | 16.2                           | 1195 ± 15           | 965 ± 151  | 229±137      |           |
|          |                   | 15.8 ± 0.41                           | 28.1 ± 2.93                            | 14.0                           | 1070 ± 10           | 852 ± 133  | 218±121      |           |
|          |                   | 4.35 ± 0.54                           | 7.96 ± 1.93                            | 4.0                            | 397 ± 7             | 235 ± 37   | 163±34       |           |
| 345      | PAA               | 8.91 ± 0.50                           | 14.4 ± 2.25                            | 7.2                            | 589 ± 8             | 454 ± 71   | 135±65       | 3.5 ± 0.4 |
|          |                   | 19.3 ± 0.39                           | 36.3 ± 3.35                            | 18.2                           | 1193 ± 13           | 983 ± 154  | 209±140      |           |
|          |                   | 12.6 ± 0.45                           | 22.5 ± 2.66                            | 11.3                           | 787 ± 11            | 642 ± 100  | 145±91       |           |
|          |                   | 17.9 ± 0.40                           | 31.9 ± 3.13                            | 16.0                           | 1104 ± 13           | 912 ± 142  | 192±130      |           |
|          |                   | 15.7 ± 0.42                           | 28.3 ± 2.95                            | 14.2                           | 995 ± 13            | 800 ± 125  | 195±114      |           |
|          |                   | 5.66 ± 0.54                           | 10.4 ± 2.05                            | 5.2                            | 406 ± 6             | 288 ± 45   | 118±41       |           |
| 353      | PAA               | 8.81 ± 0.50                           | 14.8 ± 2.27                            | 7.4                            | 548 ± 16            | 429 ± 67   | 120±63       | 4.0 ± 0.4 |
|          |                   | 19.6 ± 0.39                           | 35.5 ± 3.31                            | 17.8                           | 1155 ± 10           | 954 ± 149  | 201±135      |           |
|          |                   | 12.8 ± 0.45                           | 22.6 ± 2.66                            | 11.3                           | 776 ± 14            | 623 ± 97   | 154±89       |           |
|          |                   | 17.3 ± 0.40                           | 32.5 ± 3.16                            | 16.3                           | 1013 ± 10           | 842 ± 132  | 171±119      |           |
|          |                   | 15.6 ± 0.42                           | 28.4 ± 2.95                            | 14.2                           | 915 ± 15            | 759 ± 119  | 156±108      |           |
|          |                   | 5.46 ± 0.57                           | 8.83 ± 1.97                            | 4.4                            | 351 ± 8             | 266 ± 42   | 85±38        |           |
| 298      | DONO <sub>2</sub> | 12.6 ± 0.52                           | 26.9 ± 2.87                            | 2                              | 1993 ± 41           | 890 ± 139  | 1104±132     | 4.3 ± 0.5 |
|          |                   | 8.89 ± 0.28                           | 18.4 ± 2.45                            | 2                              | 1686 ± 36           | 628 ± 98   | 1058±96      |           |
|          |                   | 15.8 ± 0.41                           | 33.3 ± 3.20                            | 2                              | 2218 ± 54           | 1116 ± 174 | 1102±167     |           |
|          |                   | 29.4 ± 0.66                           | 61.9 ± 4.63                            | 2                              | 3325 ± 71           | 2076 ± 324 | 1249±302     |           |
|          |                   | 23.5 ± 0.64                           | 49.0 ± 3.98                            | 2                              | 2862 ± 73           | 1659 ± 259 | 1202±246     |           |

<sup>a</sup>Concentration of CH<sub>3</sub>C(O)OH in 10<sup>14</sup> molecule cm<sup>-3</sup>. <sup>b</sup>Concentration of CH<sub>3</sub>C(O)OOH in 10<sup>14</sup> molecule cm<sup>-3</sup>. <sup>c</sup>OH concentration in 10<sup>11</sup> molecule cm<sup>-3</sup>.

**Table S3.** Reaction scheme used in the numerical simulations.

| Reaction                                                                                                       | Rate coefficient                       | Reference                                         |
|----------------------------------------------------------------------------------------------------------------|----------------------------------------|---------------------------------------------------|
| $\text{OH} + \text{CH}_3\text{COOH} \rightarrow \text{H}_2\text{O} + \text{CH}_3 + \text{CO}_2$                | $8.4 \times 10^{-20} T^2 \exp(1356/T)$ | (IUPAC, 2020)                                     |
| $\text{OH} + \text{CH}_3\text{C(O)OOH} \rightarrow \text{H}_2\text{O} + \text{CH}_3\text{C(O)O}_2$             | varied                                 | This work                                         |
| $\text{OH} + \text{CH}_3 \rightarrow \text{CH}_3\text{OH}$                                                     | $1.2 \times 10^{-10}$                  | (Sangwan et al., 2012)                            |
| $\text{OH} + \text{CH}_3\text{C(O)O}_2 = \text{HO}_2 + \text{CH}_3$                                            | $1 \times 10^{-10}$                    | By analogy to $\text{OH} + \text{CH}_3\text{O}_2$ |
| $\text{OH} + \text{HO}_2 \rightarrow \text{H}_2\text{O} + \text{O}_2$                                          | $4.8 \times 10^{-11} \exp(250/T)$      | (IUPAC, 2020)                                     |
| $\text{HO}_2 + \text{HO}_2 \rightarrow \text{H}_2\text{O}_2$                                                   | $2.0 \times 10^{-12}$                  | (IUPAC, 2020)                                     |
| $\text{HO}_2 + \text{CH}_3\text{C(O)O}_2 \rightarrow \text{CH}_3\text{C(O)OOH} + \text{O}_2$                   | $1.5 \times 10^{-12} \exp(480/T)$      | (IUPAC, 2020)                                     |
| $\text{HO}_2 + \text{CH}_3\text{C(O)O}_2 \rightarrow \text{CH}_3\text{C(O)OH} + \text{O}_3$                    | $4.4 \times 10^{-15} \exp(1910/T)$     | (IUPAC, 2020)                                     |
| $\text{HO}_2 + \text{CH}_3\text{C(O)O}_2 \rightarrow \text{OH} + \text{CH}_3 + \text{CO}_2$                    | $4.66 \times 10^{-12} \exp(235/T)$     | (IUPAC, 2020)                                     |
| $\text{CH}_3 + \text{CH}_3 \rightarrow \text{C}_2\text{H}_6$                                                   | $5 \times 10^{-11}$                    | (Slagle et al., 1988)                             |
| $\text{HO}_2 + \text{CH}_3 \rightarrow \text{CH}_3\text{O} + \text{OH}$                                        | $3 \times 10^{-11}$                    | (Baulch et al., 2005)                             |
| $\text{CH}_3\text{C(O)O}_2 + \text{CH}_3\text{C(O)O}_2 \rightarrow 2 \text{CH}_3 + 2 \text{CO}_2 + \text{O}_2$ | $2.9 \times 10^{-12} \exp(500/T)$      | (IUPAC, 2020) <sup>a</sup>                        |
|                                                                                                                |                                        |                                                   |

<sup>a</sup>Assumes rapid decomposition of the initially formed  $\text{CH}_3\text{C(O)O}$  radical.

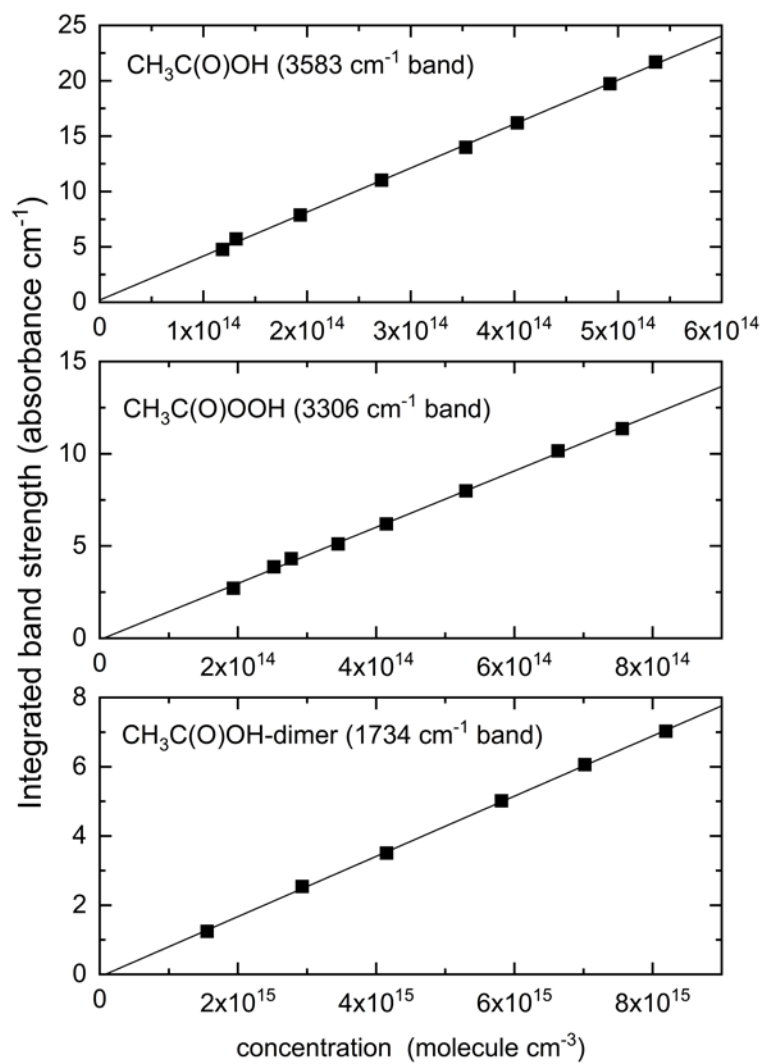

**Figure S1.** Beer-Lambert plots (integrated absorption over listed bands) versus concentration of CH<sub>3</sub>C(O)OH, CH<sub>3</sub>C(O)OOH and CH<sub>3</sub>C(O)OH-dimer.

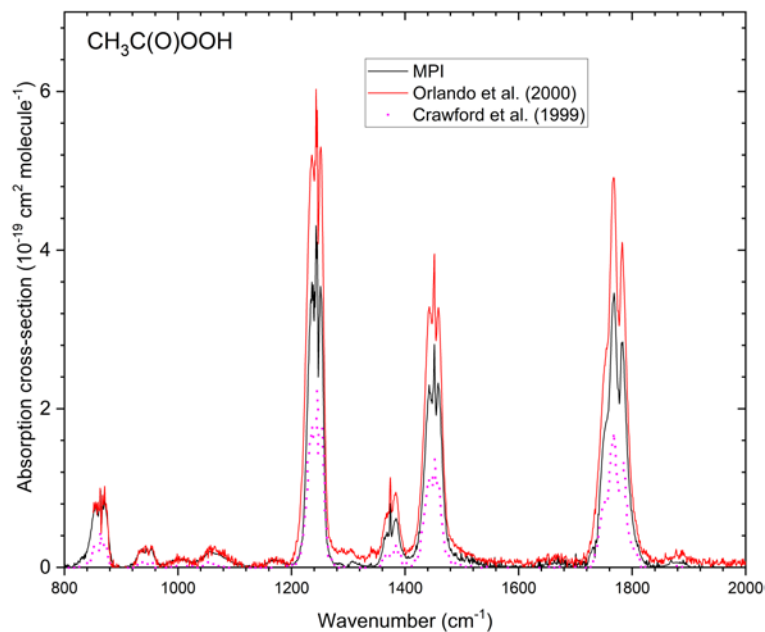

**Figure S2.** IR spectra of CH<sub>3</sub>C(O)OOH recorded in this work (MPI), and those published by Orlando et al. (2000) (who reported a single value at 1251 cm<sup>-1</sup>) and Crawford et al. (1999). The spectrum of Crawford et al. was digitized from their Figure 2, that of Orlando et al. was kindly provided by the authors.

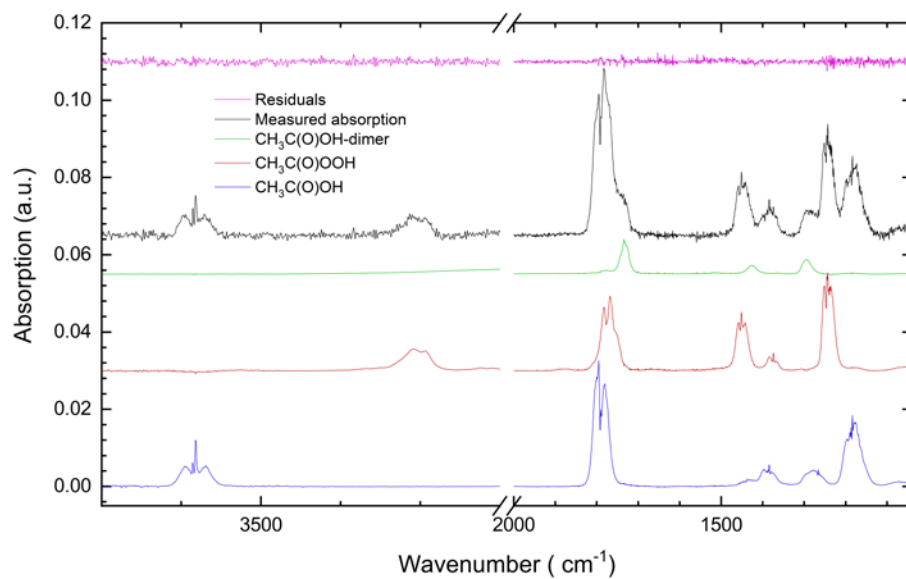

**Figure S3.** IR-absorption (black trace) measured during an experiment to determine  $k_4$  at 298 K and 125 Torr N<sub>2</sub>. The scaled reference spectra of CH<sub>3</sub>C(O)OOH, CH<sub>3</sub>C(O)OH and CH<sub>3</sub>C(O)OH-dimer as well as the residual obtained by subtraction are also displayed.

## References

Baulch, D. L., Bowman, C. T., Cobos, C. J., Cox, R. A., Just, T., Kerr, J. A., Pilling, M. J., Stocker, D., Troe, J., Tsang, W., Walker, R. W., and Warnatz, J.: Evaluated kinetic data for combustion modeling: Supplement II, J. Phys. Chem. Ref. Data, 34, 757-1397, 2005.

IUPAC: Task Group on Atmospheric Chemical Kinetic Data Evaluation, (Ammann, M., Cox, R.A., Crowley, J.N., Herrmann, H., Jenkin, M.E., McNeill, V.F., Mellouki, A., Rossi, M. J., Troe, J. and Wallington, T. J.) <http://iupac.pole-ether.fr/index.html>, 2020. 2020.

Sangwan, M., Chesnokov, E. N., and Krasnoperov, L. N.: Reaction  $\text{CH}_3 + \text{OH}$  Studied over the 294-714 K Temperature and 1-100 bar Pressure Ranges, J. Phys. Chem. A, 116, 8661-8670, 2012.

Slagle, I. R., Gutman, D., Davies, J. W., and Pilling, M. J.: Study of the recombination reaction  $\text{CH}_3 + \text{CH}_3 \rightarrow \text{C}_2\text{H}_6$ . 1. Experiment, J. Phys. Chem., 92, 2455-2462, 1988.
